# Supplementary material for: Image-Guided Precision Medicine in the Diagnosis and Treatment of Pheochromocytomas and Paragangliomas
Source: MDPI journal article supplement (doi:10.3390/cancers15184666), 2023-09-21
Supplement: s1 [file s1]

# Supplementary material

**Table S1.** Metabolic imaging radiotracer used for imaging techniques.

|           | Name                                    | Advantage                                                                                                                             | Mechanisms of action                                                                                     | Performances                                                                        | Disadvantages, adverse events                                                                     |
|-----------|-----------------------------------------|---------------------------------------------------------------------------------------------------------------------------------------|----------------------------------------------------------------------------------------------------------|-------------------------------------------------------------------------------------|---------------------------------------------------------------------------------------------------|
| SSTa      | <sup>68</sup> Ga-DOTA-TATE              | - all SSTa are theranostic tracers<br>- more accurate in lesions detection after negative MIBG scintigraphy<br>PPGLs[106,220,221]     | <sup>68</sup> Ga-labeled DOTA-conjugated somatostatin analogues                                          | 90-98% Se                                                                           |                                                                                                   |
|           | <sup>68</sup> Ga-DOTA-NOC               | -detection of NETs metastasis<br>-more efficient in comparison to <sup>18</sup> F-DOPA [222]                                          |                                                                                                          | 100% Se and Spe[224]                                                                | Lack of availability worldwide<br>Need for expensive generator and experienced radiopharmacy unit |
|           | <sup>68</sup> Ga-DOTATOC                | -good sensibility for metastatic PCCs<br>-detection of NETs bone metastases [225]                                                     | good affinity for SSR-2, SSR-3 and SSR-5[223]                                                            | (92%)[226]                                                                          |                                                                                                   |
|           | <sup>68</sup> Ga-DATATOC                | easier and quicker preparation of the radiopharmaceutical tracer than DOTA. [227]                                                     |                                                                                                          | to be determined                                                                    |                                                                                                   |
| MIBG      | <sup>123</sup> or <sup>131</sup> I-MIBG | Theranostic tracer<br>Long experience<br>Better analysis than CT/MRI when anatomical distortion (post-surgery, scars, metallic clips) | Analogue of guanethidine, cellular uptake by NET                                                         | Se 74-97% in PPGL (lower if metastatic) except thoracic and HaN PGL : poor          | Physiological uptake in adrenal gland<br>Drug interactions                                        |
| FDA/FDOPA |                                         | Low uptake in normal adrenal gland                                                                                                    | FDOPA is a precursor of FDA in catecholamine synthesis, cellular uptake by LAT1, decarboxylated into FDA | Se and Spe superior to 90%                                                          | Lower sensibility in MPPGLs and SDHx-related PPGLs<br>Not a theranostic tracer                    |
| FDG       |                                         | poor sensitivity for non-metastatic sporadic PCCs (58%)                                                                               | FDG is a surrogate of glucose, with a cellular uptake mainly by GLUT1 and GLUT3 transporters             | Better than MIBG scintigraphy, in MPPGLs (82%)<br>High sensitivity in SDHx patients | Lack of specificity for PPGL and PCC<br>Not a theranostic tracer                                  |

**Table S2.** Systemic and theranostic therapies.

|                                           | Target                                                                                                  | Cellular clinical effects                                                                                                                                               | Radiological patterns of response                                                                                   | Clinical benefits, ongoing trials                                                                                                                                                                            |
|-------------------------------------------|---------------------------------------------------------------------------------------------------------|-------------------------------------------------------------------------------------------------------------------------------------------------------------------------|---------------------------------------------------------------------------------------------------------------------|--------------------------------------------------------------------------------------------------------------------------------------------------------------------------------------------------------------|
| <b>Chemotherapy</b>                       | CVD-protocol: cyclophosphamide, vincristine and dacarbazine                                             | catecholamine excretion reduction?                                                                                                                                      | decrease in size                                                                                                    | - catecholamine excess improvement (30-40% of patients)<br>-unclear benefit on overall survival in MPPGLs for several adverse events[147–149]<br>LAMPARA trial (NCT03946527), assessing Lanreotide in MPPGLs |
| <b>SSTa therapies</b>                     |                                                                                                         | tumor cells growth inhibition apoptosis activation                                                                                                                      |                                                                                                                     | significant improvement of clinical symptoms (flush, diarrhea) in GEP NETs[161,162]                                                                                                                          |
| <b>Interferon alpha</b>                   | natural killer lymphocyte functions stimulation                                                         |                                                                                                                                                                         | growth control (stable disease)                                                                                     | clinical improvement of pain, headaches, paradoxical diarrhea, sweating                                                                                                                                      |
| <b>Tyrosine kinase inhibitors (TKI)</b>   |                                                                                                         | anti-neoangiogenic, pro-apoptotic, inhibitor of cell growth and cell migration                                                                                          | decrease in size[158,163]<br>diminution of glucose uptake[159]<br>PFS improvement[160]                              | - Sunitinib : FIRST-MAPPP trial NCT01371201<br>- Axitinib: NCT01967576<br>- Cabozantinib: NCT02302833                                                                                                        |
| <b>Immune checkpoint inhibitors (ICI)</b> | - CTLA-4: ipilimumab<br>- PD-1: nivolumab, pembrolizumab<br>- PD-L1: atezolizumab, avelumab, durvalumab | - tumor reduction<br>- hormonal secretion reduction in MMP-PGLs                                                                                                         | pseudoprogression<br>hyperprogression<br>abscopal effect                                                            | NCT02721732: rare tumors including MPPGLs                                                                                                                                                                    |
| <b>PRRT</b>                               | <sup>90</sup> Y-DOTATOC                                                                                 | limited adverse events (nausea, reversible hematopoietic toxicity)[182,183]                                                                                             | -good sensibility for metastatic PCCs<br>- detection of NETs bone metastases [225]<br>- morphological response[181] | symptomatic response (pain, carcinoid syndrome)                                                                                                                                                              |
|                                           | <sup>177</sup> Lu-DOTATATE                                                                              | ( <sup>177</sup> Lu-DOTATATE in mPPGLs is promising but should be limited to MIBG-negative patients[228])<br>Encouraging preliminary studies hint at similar results as | RECIST 1.1 criteria are widely used for studies.                                                                    | <sup>177</sup> Lu is not a pure beta-emitter, but also emits low energy gamma-rays, allowing post-therapy imaging and dosimetry<br><br>ongoing clinical trial (NCT03206060) PRRT in inoperable PPGL          |

|                                                             | those obtained for<br>NETs (ref)                                                                                                                                                                                                                                    | ( <sup>177</sup> LuDOTATE for<br>PCCs and <sup>68</sup> GaDOTA-<br>TATE for PGLs) |
|-------------------------------------------------------------|---------------------------------------------------------------------------------------------------------------------------------------------------------------------------------------------------------------------------------------------------------------------|-----------------------------------------------------------------------------------|
| <b>Iobenguane or<br/><sup>131</sup>I-MIBG</b> [174–<br>176] | reduction in size<br>on CT scan, and a<br>lower MIBG up-<br>take[177]<br>In HaN PGLs, po-<br>tential alternative<br>when neurovascu-<br>lar structure loca-<br>tion is a contrain-<br>dication to surgery<br>or radiation ther-<br>apy, to achieve PR<br>or SD[187] | β- particle and γ-radia-<br>tion by nuclear trans-<br>formation                   |

**Table S3.** Imaging biomarkers currently used in PPGLs.

|                                                   |                                                        | <b>Imaging modality/ calcula-<br/>tion method</b>                                  | <b>Advantage</b>                                                                                                                                                                                                                       |
|---------------------------------------------------|--------------------------------------------------------|------------------------------------------------------------------------------------|----------------------------------------------------------------------------------------------------------------------------------------------------------------------------------------------------------------------------------------|
| <b>Anatomical<br/>imaging</b>                     | Tumor Growth Rate<br>TGR                               | 2D on CT scan, as the per-<br>centage change in tumor size<br>over one month (%/m) | early predictor of PFS<br>[203,204]                                                                                                                                                                                                    |
|                                                   | Volume assessments for<br>early detection of<br>change | 3D on CT scan, volume meas-<br>urement                                             | better inter-operator agree-<br>ment,<br>earlier partial response or<br>progressive disease[202]                                                                                                                                       |
| <b>SPECT / PET<br/>metabolic bi-<br/>omarkers</b> | SUV max                                                | 2D on PET CT                                                                       | - in advanced (NSCLC) sig-<br>nificantly predictive of re-<br>sponse to anti-PD-1 antibody<br>-from pretherapeutic <sup>68</sup> Ga-<br>DOTATOC-PET/CT for<br>NET, predictive of response<br>probability of PRRT.ther-<br>apy[229,230] |
|                                                   | Metabolic Tumor Vol-<br>ume (MTV)                      | a margin threshold of x% of<br>SUVmax                                              | pancreatic NETs: predictor<br>of overall survival[231]                                                                                                                                                                                 |
|                                                   | Total Metabolic Tumor<br>Volume (TMTV)                 | 3D                                                                                 | In advanced NSCLC or mel-<br>anoma treated with ICIs :<br>high pretreatment <sup>18</sup> F-FDG<br>PET TMTV was associated<br>with shorter PFS<br>-risk stratify patients with<br>different overall survival<br>probabilities[232,233] |

|           |                                                                                                                        |                                                                                                                                                                     |                                                                                                                                      |
|-----------|------------------------------------------------------------------------------------------------------------------------|---------------------------------------------------------------------------------------------------------------------------------------------------------------------|--------------------------------------------------------------------------------------------------------------------------------------|
|           | Somatostatin Receptor Expressing Tumor Volume (SRETV, mL) and Total Lesion Somatostatin Receptor Expression (TLSRE, g) | $^{68}\text{Ga}$ -DOTATATE PET/CT, 3D                                                                                                                               | significant and independent prognostic value in well-differentiated NETs on PFS <sup>176</sup>                                       |
| Radiomics | Asphericity (ASP)                                                                                                      | $^{111}\text{In}$ -octreotide scintigraphy prior to PRRT imaging-based quantification of lesion's spatial heterogeneity with an automatic algorithm for delineation | GEP-NETs response prediction : higher ASP was significantly associated with worse response [234]                                     |
|           | Textural features (TF):                                                                                                | 2D and 3D, voxel level entropy, homogeneity, intensity variation...                                                                                                 | In GEP-NET patients undergoing pre-therapeutic SSTR-PET CT, entropy and intensity were significant predictors of OS <sup>177</sup> . |
